# Supplementary material for: Electrospun hollow glassy carbon–reduced graphene oxide nanofibers with encapsulated ZnO nanoparticles: a free standing anode for Li-ion batteries
Source: Royal Society of Chemistry journal article supplement (doi:10.1039/c4ta07220k), 2015-01-01
Supplement: c4ta07220k1.pdf [file c4ta07220k1.pdf]

## Supplementary Information

### **Electrospun Hollow Glassy Carbon/Reduced Graphene Oxide Nanofibers with Encapsulated ZnO Nanoparticles: A Free Standing Anode for Li-ion Battery**

Shilpa,<sup>a</sup> Basavanakote M. Basavaraja,<sup>a</sup> Subhasish B. Majumder<sup>b</sup> and Ashutosh Sharma<sup>a\*</sup>

<sup>a</sup> Department of Chemical Engineering, Indian Institute of Technology Kanpur, 208016, India

<sup>b</sup> Materials Science Centre, Indian Institute of Technology Kharagpur, 721302, India

\*Corresponding author. Tel.: +91-512-259-7026. E-mail: [ashutos@iitk.ac.in](mailto:ashutos@iitk.ac.in) (Ashutosh Sharma)

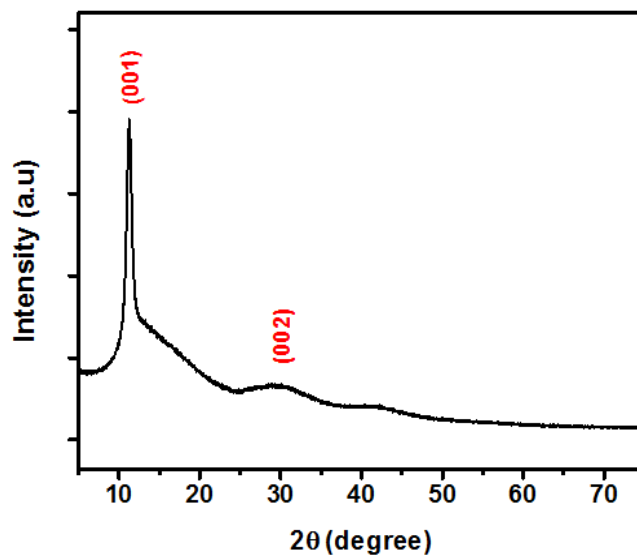

Fig S1: X-ray diffraction pattern of GO synthesized by the modified Hummer's method.

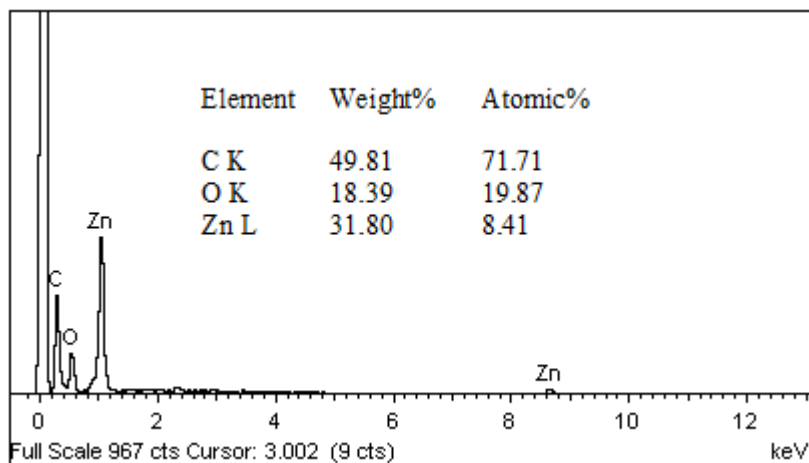

Fig S2: EDX spectra obtained from ZnO-C-rGO nanofibers showing ZnO weight percentage to be 50.19% in the composite.

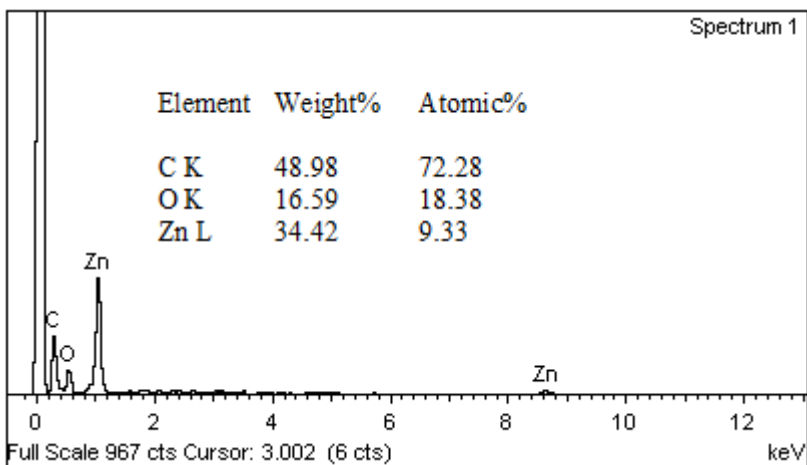

*Fig S3: EDX spectra obtained from ZnO-C-rGO nanofibers showing ZnO weight percentage to be 51.01% in the composite.*
